# Supplementary material for: Boosting the sensitivity with time-gated luminescence thermometry using a nanosized molecular cluster aggregate
Source: Royal Society of Chemistry journal article supplement (doi:10.1039/d2nr06382d), 2023-01-01
Supplement: d2nr06382d1.pdf [file d2nr06382d1.pdf]

Supporting Information

**Boosting the Sensitivity with Time-Gated  
Luminescence Thermometry Using a Nanosized  
Molecular Cluster-Aggregate**

*Diogo A. Gálico<sup>†</sup>, Muralee Murugesu<sup>†\*</sup>*

<sup>†</sup>Department of Chemistry and Biomolecular Sciences, University of Ottawa, Ottawa,  
Ontario K1N 6N5, Canada.

\*Corresponding Author: M. Murugesu (E-mail: [m.murugesu@uottawa.ca](mailto:m.murugesu@uottawa.ca))

**Figures and Tables:**

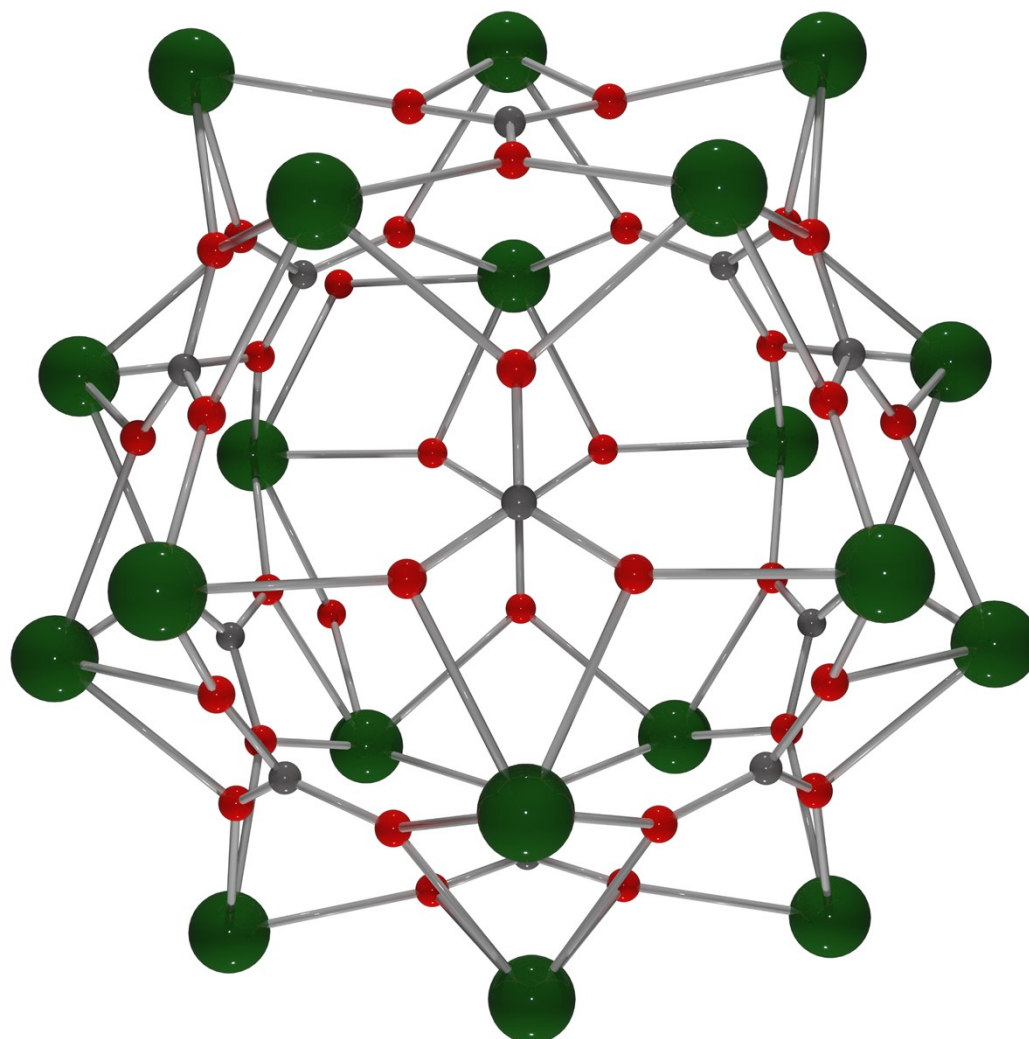

**Figure S1.** Molecular core structure of the  $\{\text{Ln}_{20}\}$  MCA viewed along the crystallographic axes *c* (CCDC number: 2023789). Organic ligand, hydrogen and solvent atoms are omitted for clarity. Color code: Green for terbium, gray for carbon, and red for oxygen.

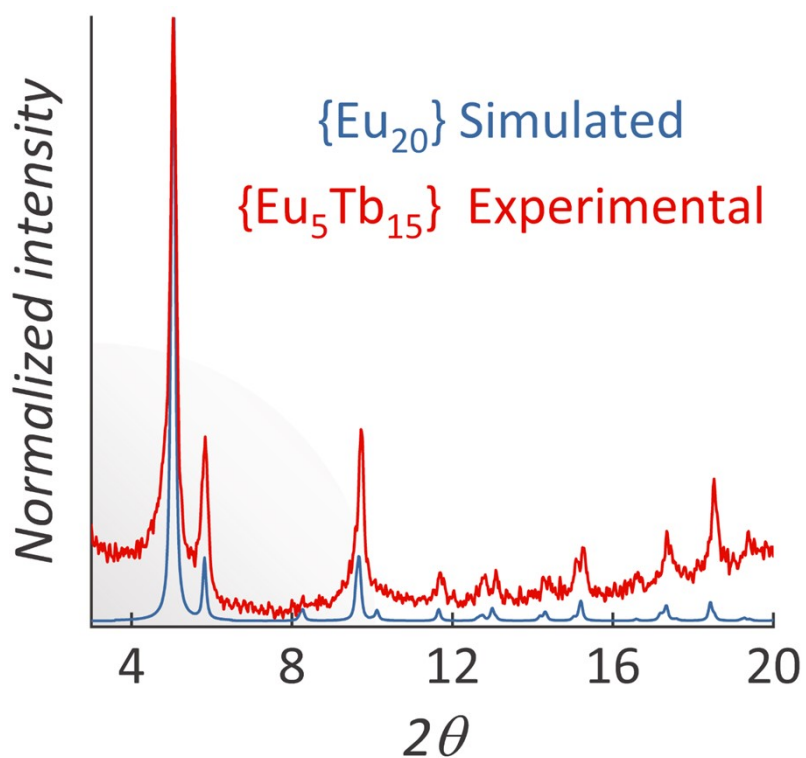

**Figure S2.** Simulated and experimental PXRD patterns for {Eu<sub>5</sub>Tb<sub>15</sub>} MCA. Simulated diffractogram refers to {Eu<sub>20</sub>} MCA (CCDC number: 2023766).

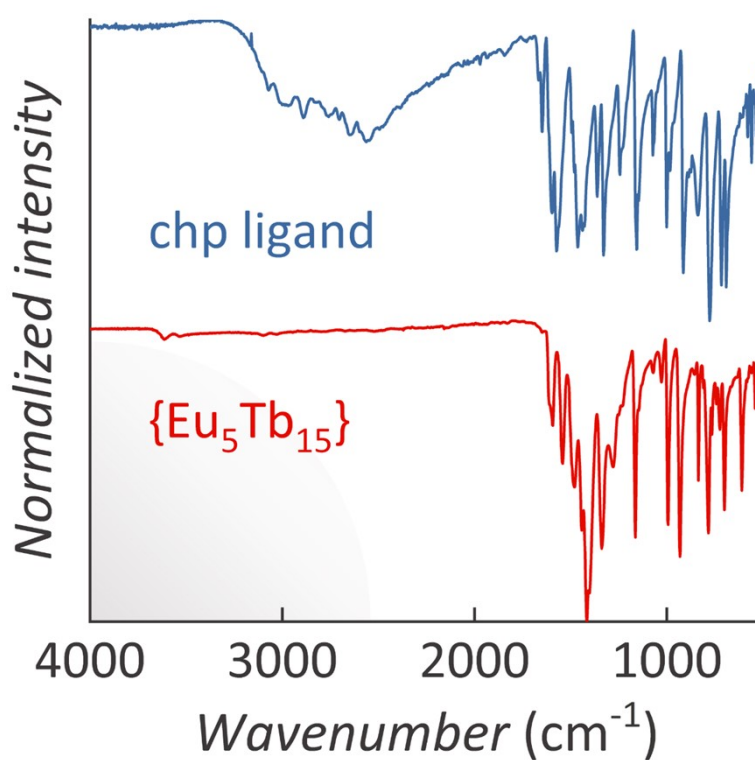

**Figure S3.** FTIR spectra for chp ligand and {Eu<sub>5</sub>Tb<sub>15</sub>} MCA.

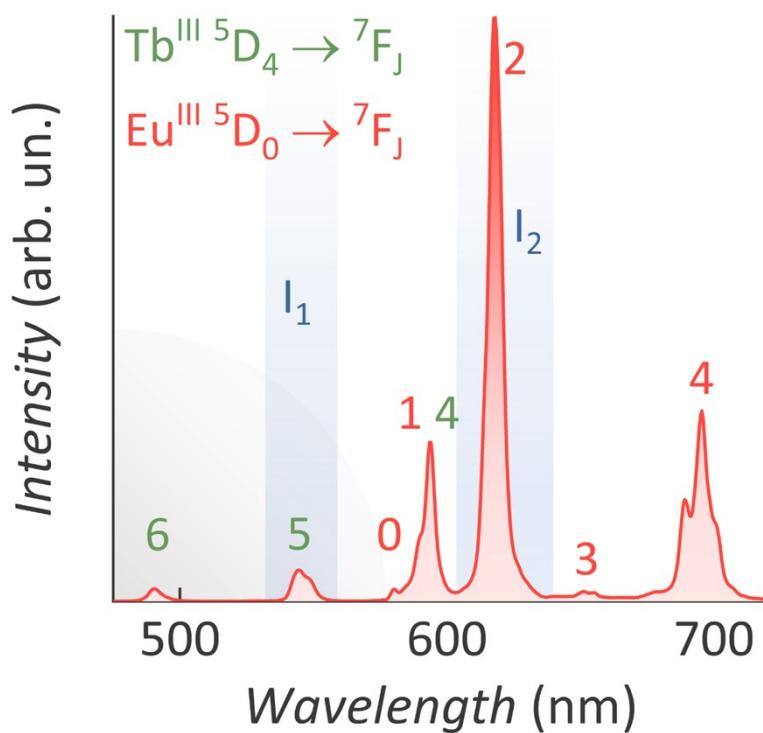

**Figure S4.** Continuous emission spectrum for a 0.1 g mL<sup>-1</sup> acetonitrile solution of {Eu<sub>5</sub>Tb<sub>15</sub>} MCA obtained at 25 °C. Transitions and integrated areas (I<sub>1</sub> and I<sub>2</sub>) for the thermometry studies are labelled.

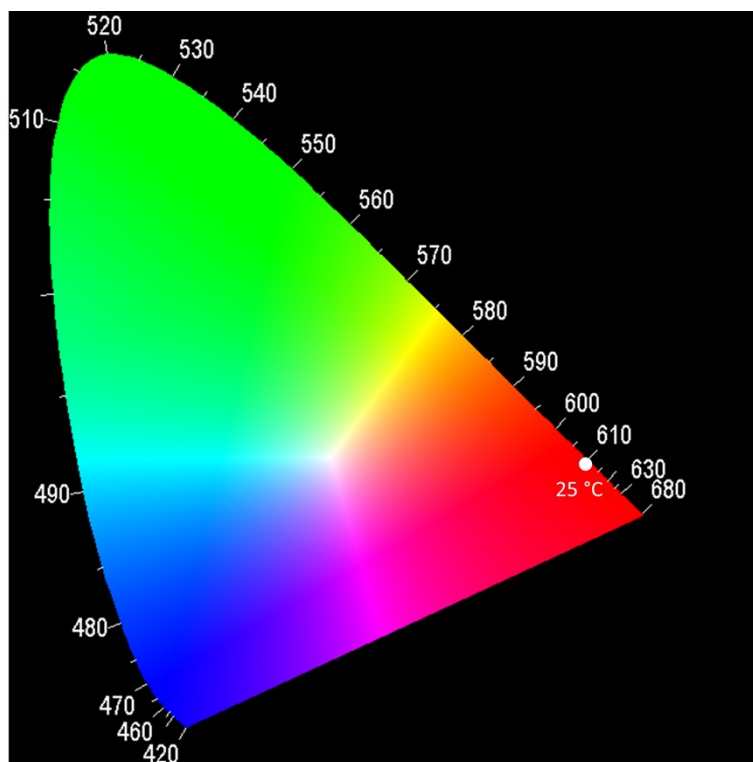

**Figure S5.** CIE diagram for the continuous emission spectrum showing the predominant red color at 25 °C.

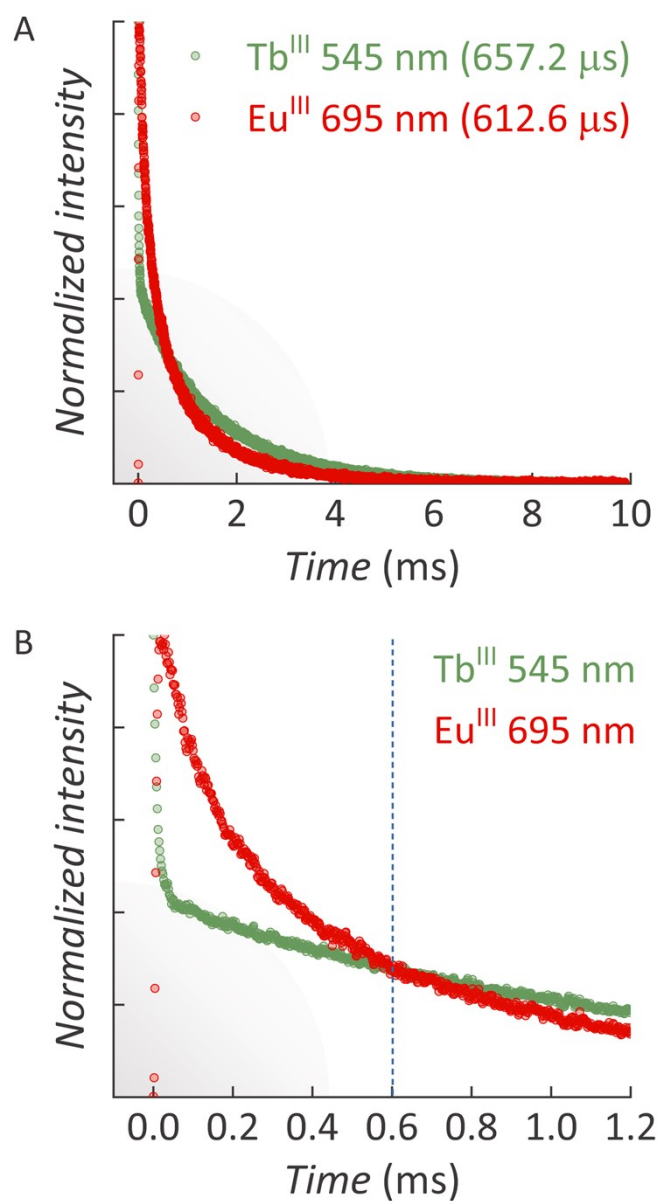

**Figure S6.** (a) Decay curves displayed in linear scale obtained at 25 °C monitoring Tb<sup>III</sup> and Eu<sup>III</sup> components ( $\lambda_{\text{ex}} = 312 \text{ nm}$ ). (b) Magnification of the 0 – 1.2 ms range.

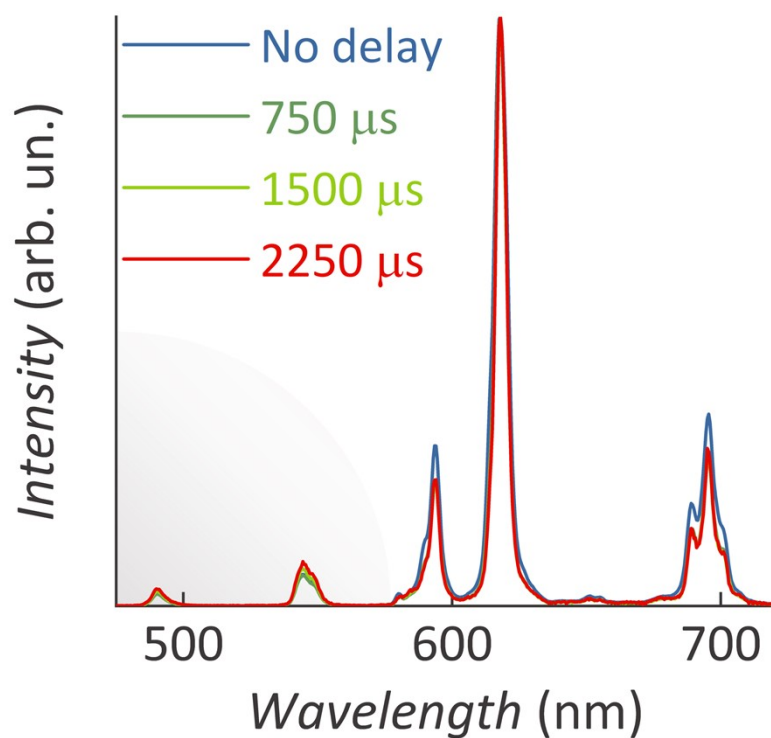

**Figure S7.** Time-gated emission spectra obtained at 20 °C for  $\{\text{Eu}_5\text{Tb}_{15}\}$ .

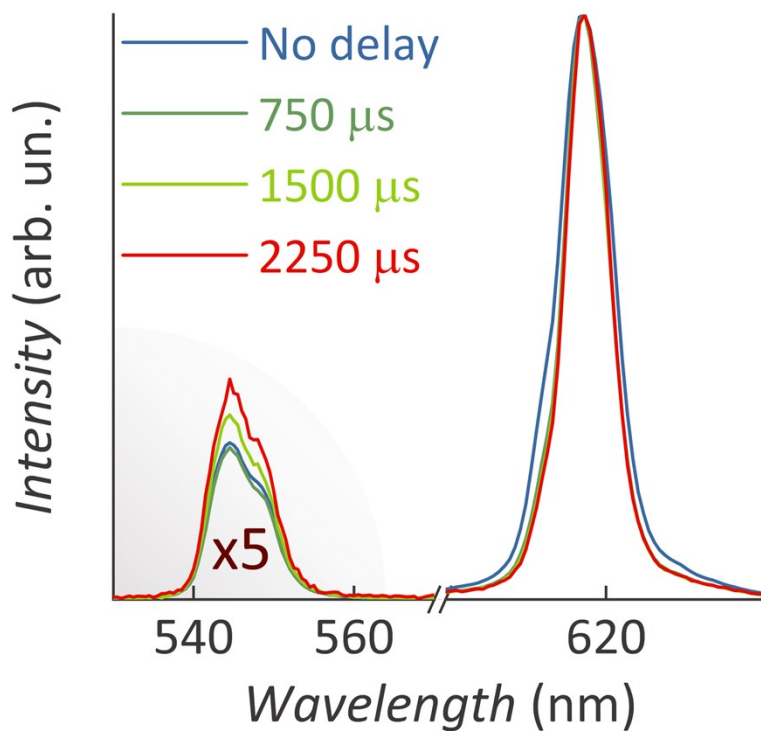

**Figure S8.** Magnification of the most intense transitions for  $\text{Tb}^{\text{III}}$  and  $\text{Eu}^{\text{III}}$  ions (same data from the figure S6).  $\text{Tb}^{\text{III}}$  components were multiplied to facilitate the visualization.

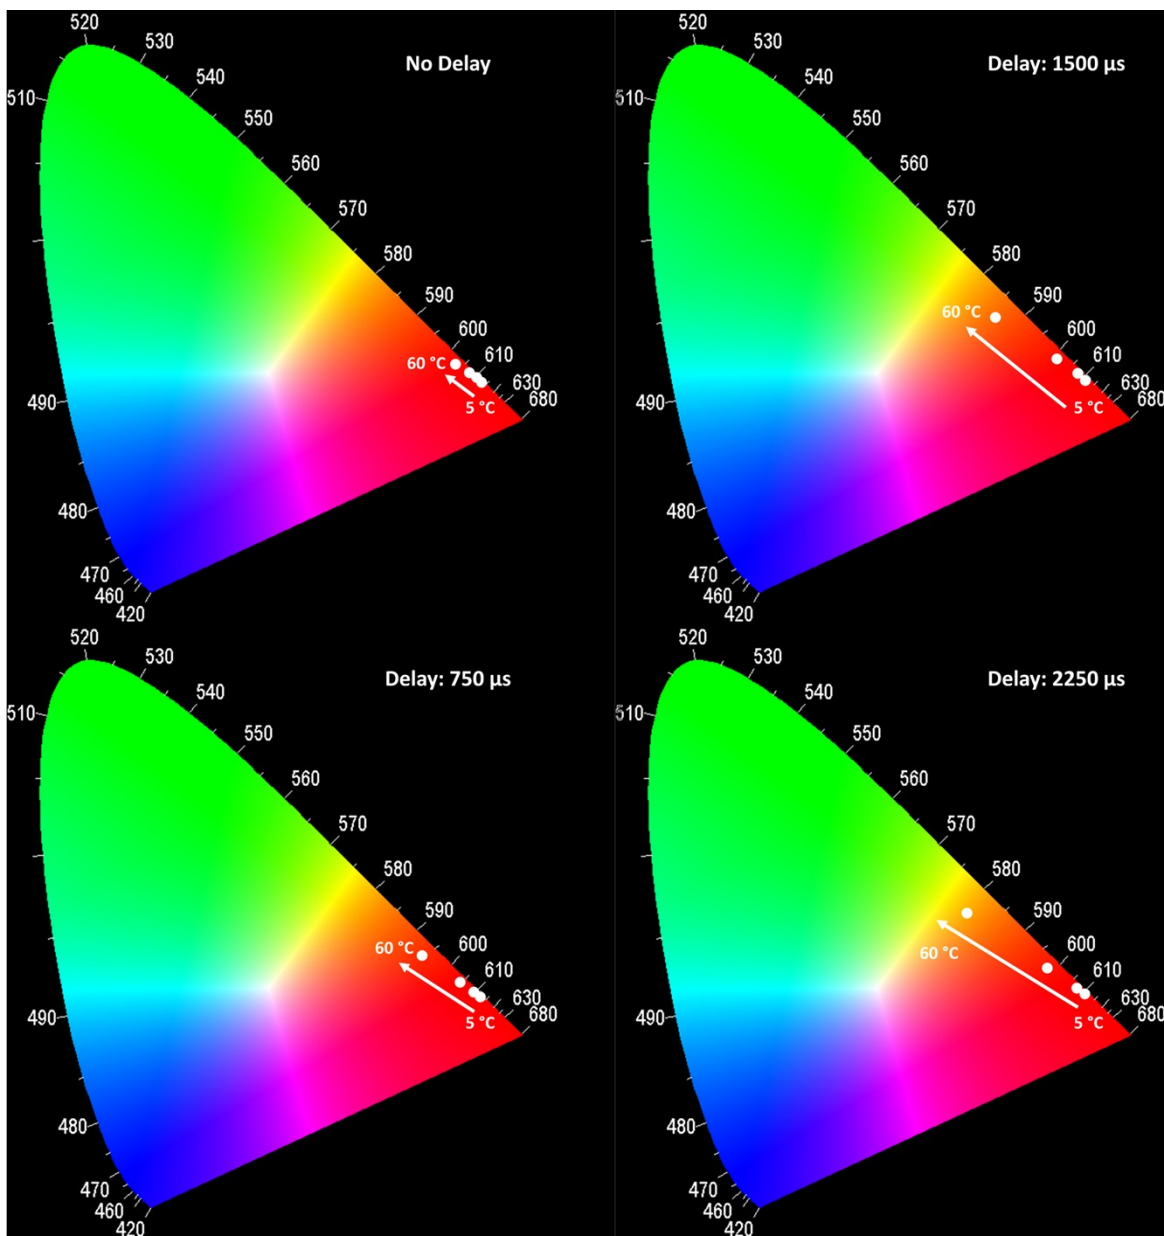

**Figure S9.** CIE diagram for the time-gated temperature-dependent emission spectra highlighting the coordinates at 5, 20, 40, and 60 °C.

**Table S1.** Best-fitting parameters for the thermometric parameter ( $\Delta$ ).

| Detection delay | $A_1$  | $A_2$  | $X_0$  | $r^2$ |
|-----------------|--------|--------|--------|-------|
| 0               | 46.211 | -5.490 | -1.093 | 0.999 |
| 750             | 42.252 | -2.158 | 5.086  | 0.999 |
| 1500            | 34.561 | -1.284 | 6.931  | 0.999 |
| 2250            | 30.273 | -0.995 | 7.823  | 0.999 |

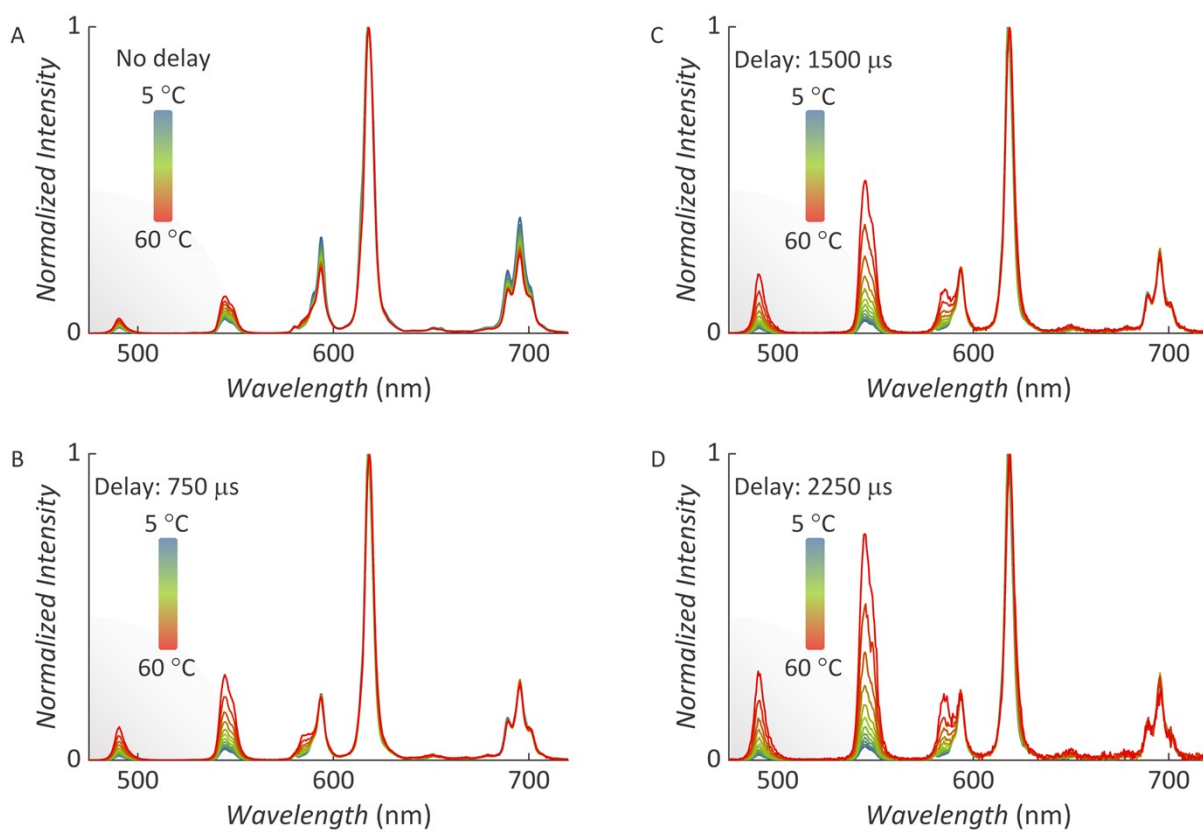

**Figure S10.** Normalized temperature-dependent time-gated emission spectra for  $\{\text{Eu}_5\text{Tb}_{15}\}$  with  $\lambda_{\text{ex}} = 312$  nm (a) without a detection delay and with detection delays of (b) 750, (c) 1500, and (d) 2250  $\mu\text{s}$ . Temperature step interval: 5  $^\circ\text{C}$ . (same data from Figure 2).



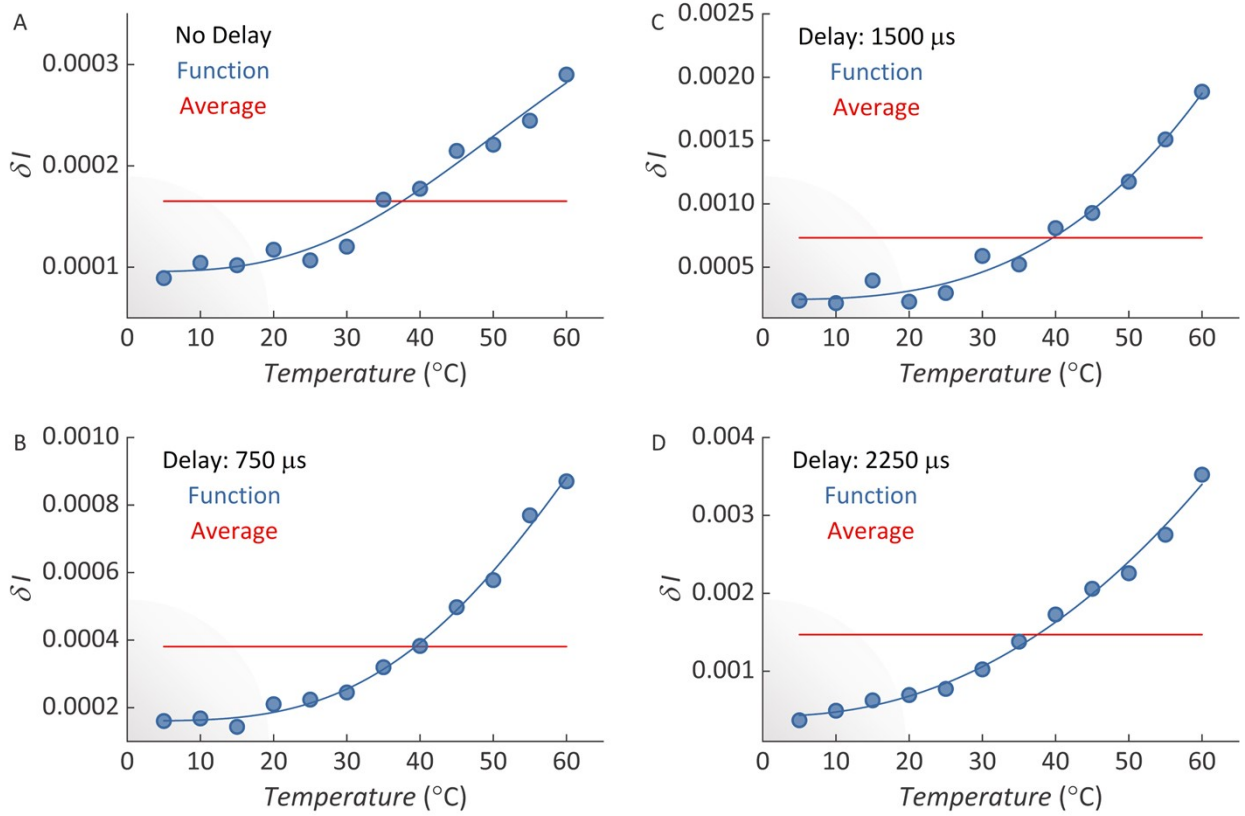

**Figure S11.** Signal fluctuations obtained *via* a temperature-dependent function (best-fit parameters in Table S2) and *via* the commonly used average method. To model the experimental data, a logistic function as implemented in OriginPro 2021 was used.

**Table S2.** Best-fitting parameters for the signal fluctuation function ( $\delta I$ ).

| Detection delay | $A_1$                 | $A_2$                 | $X_0$   | $p$  | $r^2$ |
|-----------------|-----------------------|-----------------------|---------|------|-------|
| <b>0</b>        | $8.56 \times 10^{-5}$ | $4.94 \times 10^{-4}$ | 62.59   | 3.04 | 0.977 |
| <b>750</b>      | $1.61 \times 10^{-4}$ | $3.17 \times 10^{-3}$ | 85.26   | 3.29 | 0.994 |
| <b>1500</b>     | $2.45 \times 10^{-4}$ | 1.44                  | 618.67  | 2.91 | 0.983 |
| <b>2250</b>     | $4.23 \times 10^{-4}$ | 55.14                 | 4974.39 | 2.22 | 0.992 |
